# Supplementary material for: Preparation and crystal structure of K2Ce(PO4)2: a new complex phosphate of Ce(iv) having structure with one-dimensional channels
Source: Royal Society of Chemistry journal article supplement (doi:10.1039/c5dt03288a), 2015-11-18
Supplement: c5dt03288a1.pdf [file c5dt03288a1.pdf]

***Preparation and Crystal Structure of  $K_2Ce(PO_4)_2$ : A New  
Complex Phosphate of Ce(IV) Having Structure With One-  
Dimensional Channels***

*Samatha Bevara,<sup>1,2</sup> S. Nagabhusan Achary,<sup>1,2</sup> Sadiqua J. Patwe,<sup>1</sup> Anil K. Sinha,<sup>2,3</sup> and Avesh  
Kumar Tyagi<sup>1,2</sup>*

*<sup>1</sup>Chemistry Division, Bhabha Atomic Research Centre, Mumbai 400085, India*

*<sup>3</sup>Indus Synchrotrons Utilization Division, Raja Ramanna Centre for Advanced Technology,  
Indore 452013, India*

<sup>2</sup>Also affiliated to:

*Homi Bhabha National Institute,*

*Anushakti Nagar, Mumbai 400094*

*India*

**Electronic Supplementary Information**

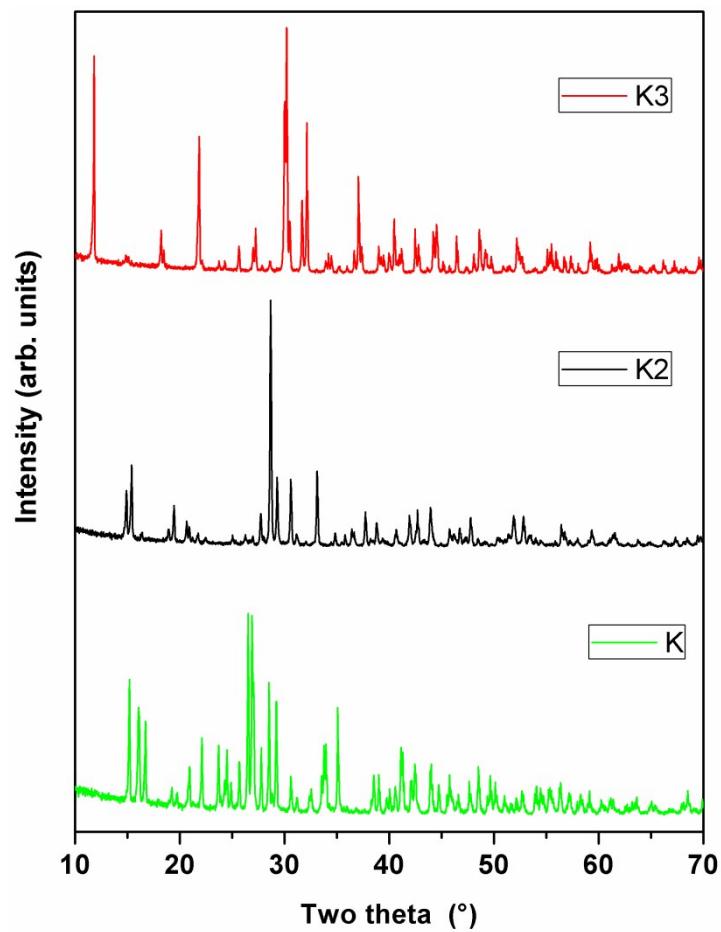

ESI-1. Powder XRD patterns of different phosphates with different K:Ce ratio. (1:1 K, 2:1 K2, 3:1 K3)

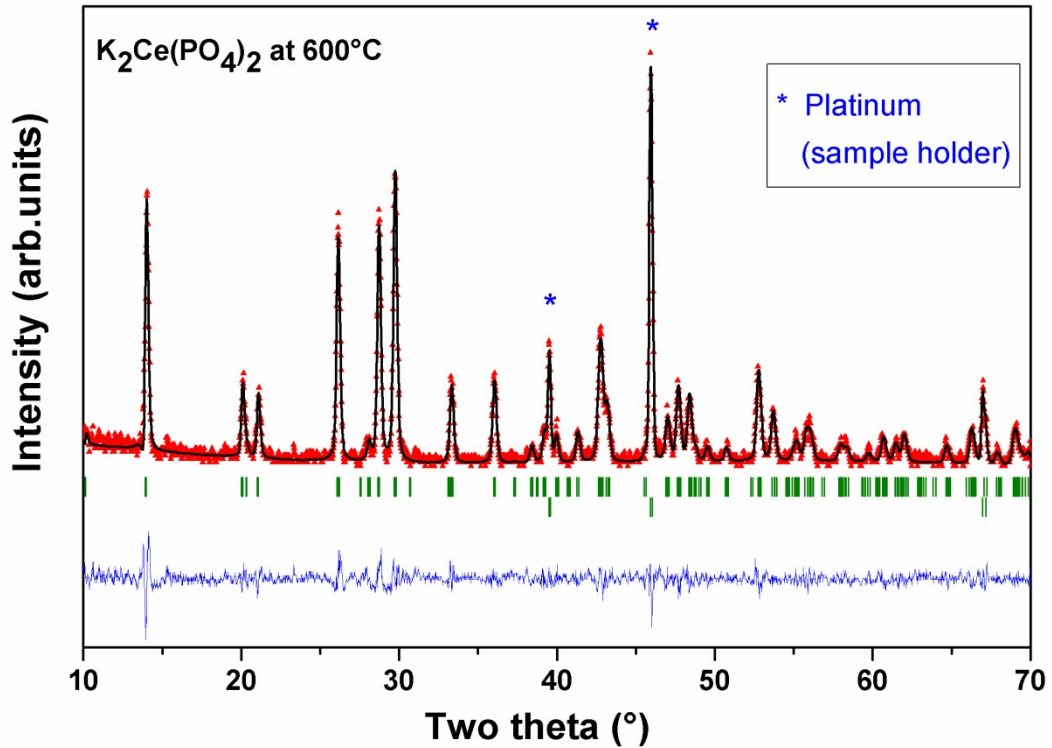

ESI-2. Typical XRD pattern of  $\text{K}_2\text{Ce}(\text{PO}_4)_2$  recorded at  $600^\circ\text{C}$ . The profile was fitted with space group:  $\text{Imma}$ . The vertical ticks indicate Bragg positions (upper row for  $\text{K}_2\text{Ce}(\text{PO}_4)_2$  and lower are for platinum sample holder).

Unit cell parameters of high temperature phase of  $\text{K}_2\text{Ce}(\text{PO}_4)_2$  are :  $a = 6.829(1)$ ,  $b = 6.811(2)$ ,  $c = 17.487(2)$  Å,  $V = 813.4(3)$  Å<sup>3</sup>.

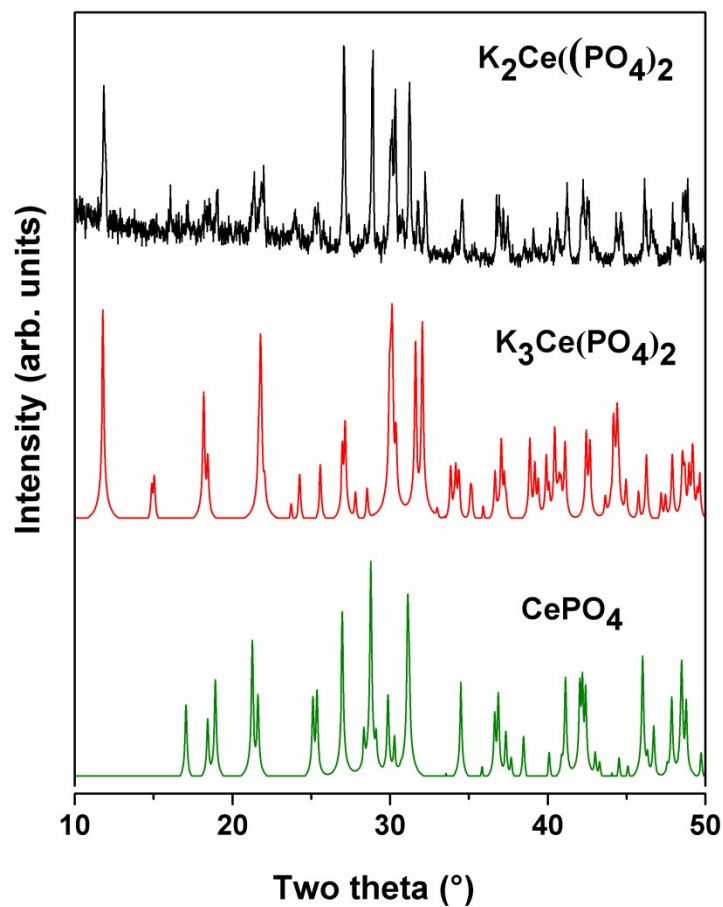

ESI-3. Typical XRD pattern of  $K_2Ce(PO_4)_2$  recorded after heating a  $900^\circ\text{C}$  for 5h (upper panel). The calculated XRD patterns of  $K_3Ce(PO_4)_2$  and  $CePO_4$  are shown in the lower panels. Structural data for  $K_3Ce(PO_4)_2$  and  $CePO_4$  are taken from references. *J. J. Zah-Letho, P. Houeneou, and R. Eholie, Comptes Rendus Hebdo. des Seances, Ser 2. 1988, 307, 1177* and *Y.-X. Ni, J. M. Hughes, and A. N. Mariano, Am. Mineral. 1995, 80, 21.*

ESI-4. Table of motifs of mutual adjunction of  $K_2Ce(PO_4)_2$  and related compounds.

(a).  $K_2Ce(PO_4)_2$  (Space group:  $P2_1/n$ )

|            | O11 | O12 | O13 | O14 | O21 | O22 | O23 | O24 | CN  |
|------------|-----|-----|-----|-----|-----|-----|-----|-----|-----|
| <b>Ce1</b> | 1/1 | 1/1 | 1/1 | 1/1 | 1/1 | 1/1 | 1/1 | 1/1 | 8   |
| <b>K1</b>  | 2/2 | 1/1 | 1/1 | 0/0 | 1/1 | 1/1 | 1/1 | 2/2 | 8+1 |
| <b>K2</b>  | 1/1 | 1/1 | 1/1 | 2/2 | 1/1 | 2/2 | 1/1 | 0/0 | 8+1 |
| <b>P1</b>  | 1/1 | 1/1 | 1/1 | 1/1 | 0/0 | 0/0 | 0/0 | 0/0 | 4   |
| <b>P2</b>  | 0/0 | 0/0 | 0/0 | 0/0 | 1/1 | 1/1 | 1/1 | 1/1 | 4   |
| CN         | 5   | 4   | 4   | 4   | 4   | 5   | 4   | 4   |     |

(b).  $Na_2Th(PO_4)_2$  (Space group:  $P2_1/n$ )

|            | O1  | O2  | O3  | O4  | O5  | O6  | O7  | O8  | O9  | O10 | O11 | O12 | O13 | O14 | O15 | O16 | CN  |
|------------|-----|-----|-----|-----|-----|-----|-----|-----|-----|-----|-----|-----|-----|-----|-----|-----|-----|
| <b>Th1</b> | 0/0 | 0/0 | 1/1 | 1/1 | 1/1 | 1/1 | 0/0 | 0/0 | 1/1 | 1/1 | 1/1 | 1/1 | 0/0 | 0/0 | 1/1 | 1/1 | 8+2 |
| <b>Th2</b> | 1/1 | 1/1 | 1/1 | 2/2 | 0/0 | 0/0 | 1/1 | 1/1 | 0/0 | 0/0 | 0/0 | 0/0 | 1/1 | 1/1 | 0/0 | 0/0 | 8+1 |
| <b>P1</b>  | 1/1 | 0/0 | 1/1 | 0/0 | 1/1 | 0/0 | 1/1 | 0/0 | 0/0 | 0/0 | 0/0 | 0/0 | 0/0 | 0/0 | 0/0 | 0/0 | 4   |
| <b>P2</b>  | 0/0 | 1/1 | 0/0 | 1/1 | 0/0 | 1/1 | 0/0 | 1/1 | 0/0 | 0/0 | 0/0 | 0/0 | 0/0 | 0/0 | 0/0 | 0/0 | 4   |
| <b>P3</b>  | 0/0 | 0/0 | 0/0 | 0/0 | 0/0 | 0/0 | 0/0 | 0/0 | 1/1 | 0/0 | 1/1 | 0/0 | 1/1 | 0/0 | 1/1 | 0/0 | 4   |
| <b>P4</b>  | 0/0 | 0/0 | 0/0 | 0/0 | 0/0 | 0/0 | 0/0 | 0/0 | 0/0 | 1/1 | 0/0 | 1/1 | 0/0 | 1/1 | 0/0 | 1/1 | 4   |
| <b>Na1</b> | 1/1 | 0/0 | 0/0 | 0/0 | 1/1 | 1/1 | 0/0 | 0/0 | 1/1 | 0/0 | 1/1 | 1/1 | 0/0 | 1/1 | 0/0 | 2/1 | 9   |
| <b>Na2</b> | 0/0 | 1/1 | 0/0 | 0/0 | 1/1 | 1/1 | 0/0 | 0/0 | 0/0 | 1/1 | 1/1 | 1/1 | 1/1 | 0/0 | 2/1 | 0/0 | 9   |
| <b>Na3</b> | 0/0 | 2/2 | 0/0 | 1/1 | 1/1 | 0/0 | 2/2 | 1/1 | 0/0 | 1/1 | 0/0 | 0/0 | 1/1 | 1/1 | 0/0 | 0/0 | 10  |
| <b>Na4</b> | 2/2 | 0/0 | 1/1 | 0/0 | 0/0 | 1/1 | 1/1 | 2/2 | 1/1 | 0/0 | 0/0 | 0/0 | 1/1 | 1/0 | 0/0 | 0/0 | 10  |
| CN         | 5   | 5   | 4   | 4   | 5   | 5   | 5   | 5   | 4   | 4   | 4   | 4   | 5   | 5   | 4   | 4   |     |

(c).  $Na_2Th(PO_4)_2$  (Space group:  $C2/c$ )

|            | O1  | O2  | O3  | O4  | O5  | O6  | O7  | O8  | CN  |
|------------|-----|-----|-----|-----|-----|-----|-----|-----|-----|
| <b>Th1</b> | 0/0 | 2/1 | 2/1 | 0/0 | 2/2 | 2/1 | 0/0 | 2/1 | 8+2 |
| <b>Th2</b> | 2/2 | 2/1 | 0/0 | 2/1 | 0/0 | 0/0 | 2/1 | 0/0 | 8   |
| <b>P1</b>  | 1/1 | 1/1 | 1/1 | 1/1 | 0/0 | 0/0 | 0/0 | 0/0 | 4   |
| <b>P2</b>  | 0/0 | 0/0 | 0/0 | 0/0 | 1/1 | 1/1 | 1/1 | 1/1 | 4   |
| <b>Na1</b> | 1/1 | 0/0 | 2/2 | 0/0 | 1/1 | 2/2 | 1/1 | 1/1 | 9   |
| <b>Na2</b> | 2/2 | 1/1 | 1/1 | 3/3 | 1/1 | 0/0 | 1/1 | 0/0 | 9   |
| CN         | 5   | 4   | 5   | 5   | 5   | 4   | 4   | 4   |     |

(d).  $K_2CeZr(PO_4)_2$  (Space group:  $I4_1/amd$ )

|               | O1  | O2  | CN |
|---------------|-----|-----|----|
| <b>Ce/Zr1</b> | 4/1 | 4/1 | 8  |
| <b>P1</b>     | 2/1 | 2/1 | 4  |
| <b>K1</b>     | 4/2 | 4/2 | 8  |
| CN            | 4   | 4   |    |

a. Present study

b. Galesic, N.; Matkovic, B.; Topic, M.; Coffou, E.; Sljukic, M. *Croat. Chem. Acta* **1984**, *57*, 597-608.

c. Ogorodnyk, I. V.; Zatovsky, I. V.; Baumer, V. N.; Slobodyanik, N. S.; Shishkin, O. V. *Acta Cryst. C* **2006**, *62*, i100-i102.

\*CN : Coordination number

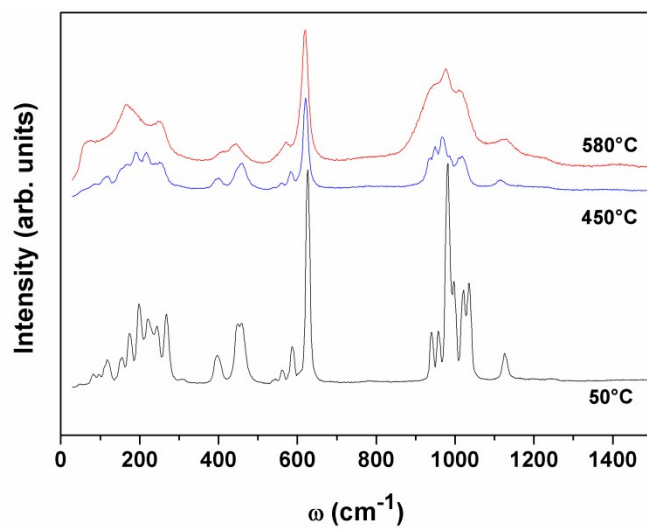

ESI-5. Typical Raman spectra of  $K_2Ce(PO_4)_2$  recorded at different temperatures.
